# Supplementary material for: MicroRNAs: From Female Fertility, Germ Cells, and Stem Cells to Cancer in Humans
Source: Stem Cells Int. 2015 Nov 9;2016:3984937. doi: 10.1155/2016/3984937 (PMC4655303; doi:10.1155/2016/3984937)
Supplement: Supplementary file 1 — Supplementary Table 1: References on miRNAs in animal oocytes and their biological functions. [file 3984937.f1.xlsx]

## Sheet: Tabelle1
									male gametogenesis	post-implantation development	endo-siRNAs essential for meiosis
	species	technical approach	follicular fluid	ovary	oocyte	granulosa cells/cumulus oophorus cells	oocyte-to-embryo transition	sperm	piRNA	microRNA	siRNA	functional effect	Literature
1	mouse	knockout-model									Dicer deletion	defects during meiosis I	Murchison EP et al., Genes Dev. 2007 Mar 15;21(6):682-93.
2	mouse	knockout-model									Ago2ADH conditional knockout	defects during meiosis I; maturation is impaired, with severe defects in spindle formation and chromosome alignment	Stein P et al., PLoS Genet. 2015 Feb 19;11(2):e1005013.
3	mouse	knockout-model								Dgcr8 deletion		Dgcr8-deficient oocytes mature normally; when fertilized with wild-type sperm, produced healthy-appearing offspring	Suh N et al. Curr Biol. 2010 Feb 9;20(3):271-7.
4	human	miRNA microarray and Real-time RT-PCR			GV and MII oocytes					MII/GV comparison: up-regulation of 4 miRNAs (hsa-miR-193a-5p, hsa-miR-297, hsa-miR-625 and hsa-miR-602) and down-regulation of 11 miRNAs (hsa-miR-888, hsa-miR-212, hsa-miR-662, hsa-miR-299-5p, hsa-miR-339-5p, hsa-miR-20a, hsa-miR-486-5p, hsa-miR-141, hsa-miR-768-5p, hsa-miR-376a and hsa-miR-15a)			Xu YW et al., J Assist Reprod Genet. 2011 Jun;28(6):559-66.
5	bovine	LNA microarray (Exiqon) 454 capture probes for human, mouse and rat miRNAs			immature and in vitro matured bovine oocytes					differential expression of 59 miRNAs, of which 31 and 28 miRNAs were found to be preferentially expressed in immature and matured oocytes			Tesfaye D et al., Mol Reprod Dev. 2009 Jul;76(7):665-77.
6	mouse	real-time RT-PCR			GV oocytes							oxidative strees induced changes in miR-132 micro-RNA, a validated Sirt1 modulator	Di Emidio G et al. Hum Reprod. 2014 Sep;29(9):2006-17.
7	mouse	knockout-model			GV oocytes					Lin28a and Lin28b knockdown have no effect on Let-7a levels in fully grown germinal vesicle (GV)-intact oocytes			Flemr M et al. Biol Reprod. 2014 Jun;90(6):131.
8	mouse	knockout-model								miR-376a was shown to be negatively correlated with PCNA mRNA expression in fetal and neonatal mouse ovaries and to directly bind to PCNA mRNA 3' untranslated region		miR-376a overexpression significantly increased primordial follicles and reduced apoptosis of oocytes	Zhang Hal. et al., Reproduction. 2014 Jul;148(1):43-54.
9	human		follicular fluid							miRNAs were detected within membrane-enclosed vesicles of human follicular fluid. MiRNA expression profiling of the follicular fluid of younger (<31 years) and older (>38 years) women revealed a set of four differentially expressed miRNAs. The predicted targets of these miRNAs are clearly enriched in genes involved in heparan-sulfate biosynthesis, extracellular matrix-receptor interaction, carboh…			Diez-Fraile A. et al., Hum Fertil (Camb). 2014 Jun;17(2):90-8.
10	human	microarrays validated using real-time PCR on additional samples. Potential gene targets were identified and their expression analyzed by real time PCR	follicular fluid							expression of 235 miRNAs, 29 were differentially expressed; using PCR validation, 5 miRNAs (32, 34c, 135a, 18b, and 9) showed significantly increased expression in the PCOS group. Pathway analysis revealed genes involved in insulin regulation and inflammation. Three potential target genes were found to have significantly decreased expression in the PCOS group (interleukin 8, synaptogamin 1 and in…			Roth LW. Et al., J Assist Reprod Genet. 2014 Mar;31(3):355-62.
11	bovine	exosomal and non-exosomal fraction; human miRCURY LNA™ Universal RT miRNA PCR array system								25 miRNAs differentially expressed (16 up and 9 down) in exosomes and 30 miRNAs differentially expressed (21 up and 9 down) in non-exosomal fraction of follicular fluid in comparison of BCB- versus BCB+ oocyte groups. Expression of selected miRNAs was detected in theca, granulosa and cumulus oocyte complex		uptake of exosomes and resulting increase of endogenous miRNA level and subsequent alteration of mRNA levels in follicular cells in vitro	Sohel M.M. et al., PLoS One. 2013 Nov 4;8(11):e78505.
12	bovine									miR-212 is expressed in oocytes and tends to increase in four-cell and eight-cell stage embryos followed by a decline at morula and blastocyst stages. Transient transfection and reporter assays revealed that miR-212 represses the expression of FIGLA in a MRE dependent manner		ectopic expression of miR-212 mimic in bovine early embryos dramatically reduced the expression of FIGLA protein	Tripurani SK et al., PLoS One. 2013 Sep 27;8(9):e76114.
13	mouse	real-time PCR				granulosa cells				expression of mmu-let-7b, mmu-let-7c, mmu-miR-27a and mmu-miR-322 was significantly lower in the GCs of follicles containing MII oocytes compared with those of MI oocytes		transfection with a mmu-miR-27a-mimic sequence decreased the oocyte maturation rate; transfection with mmu-let-7c-, mmu-miR-27a- and mmu-miR-322-inhibitor sequences increased oocyte maturation rate; expression of IGFBP-2 was higher in GCs of MII than in the GCs of MI, and higher in miR-inhibitor transfection groups than in miR-mimic transfection groups and controls	Kim YJ et al., Hum Reprod. 2013 Nov;28(11):3050-61.
14	human	oligonucleotide microarrays, TaqMan miRNA assays		MII oocytes		cumulus oophorus cells				MII oocytes (MIR184, MIR100 and MIR10A) or CCs (MIR29a, MIR30d, MIR21, MIR93, MIR320a, MIR125a and the LET7 family); 224 target genes were differentially expressed in MII oocytes and CCs, including PTGS2, CTGF and BMPR1B that are important for cumulus-oocyte communication		functional analysis using primary CC cultures revealed that BCL2 and CYP19A1 mRNA levels were decreased upon MIR23a overexpression	Assou S. et al., Hum Reprod. 2013 Nov;28(11):3038-49.
15	human	genome-wide deep sequencing, TaqMan miRNA arrays	follicular fluid							miR-132, miR-320, miR-520c-3p, miR-24, and miR-222 regulate estradiol concentrations and that miR-24, miR-193b, and miR-483-5p regulate progesterone concentrations; miR-132 and miR-320 are expressed at significantly lower levels in the follicular fluid of polycystic ovary syndrome patients			Sang Q J et al. Clin Endocrinol Metab. 2013 Jul;98(7):3068-79.
16	mouse	high-throughput, large-scale sequencing technology						sperm	sperm RNAs (spR) -12 and -13	encoded in piRNA locus on chromosome 17 ; resistant to periodate-oxidation-mediated reaction; detected in sperm and ovulated unfertilized oocytes, present in one-cell embryos and maintained in preimplantation stages, but not at later differentiation stages			Kawano M et al., PLoS One. 2012;7(9):e44542.
17	mouse				oocytes							Involvement of microRNA-335-5p in cytoskeleton dynamics in mouse oocytes	Cui XS et al., Reprod Fertil Dev. 2013;25(4):691-9.
18	porcine	TaqMan low- density array containing 365 mature human miRNAs								miR-27a was found to facilitate the first cleavage and repress the translation of its messenger RNA target (MAP2K4)			Kakourou G et al., Fertil Steril. 2013 Mar 1;99(3):803-14.
19	porcine	real-time PCR; primers designed for human miRNA			MII oocytes/embryos					86 putative porcine miRNA in MII and early embryos were detected; 21 miRNA were differentially expressed between MII and 8C, 8C and blastocyst, or MII and blastocyst		IVF culture effected expression of miR-24 at the blastocyst stage	Stowe HM et al., Gene. 2012 Jun 15;501(2):198-205
20	bovine	real-time PCR			20 oocytes at GV, GV breakdown and metaphase II		embryos at the 2-cell, 4-cell, 8-cell and blastocyst stages			linear increase during the 1-8 cell stage for the mature forms of miR-130a and miR-21		treatment α-amanitin for 30-34 h resulted in a significant decrease in miR-21, pre-miR-21, miR-130a and SRFS3	Mondou E et al., Mol Hum Reprod. 2012 Sep;18(9):425-34.
21	mouse	real-time PCR			oozyte		to blastocyst stage			the expression of the Drosha, Dgcr8, Exportin 5, Dicer, Ago1, Ago2, Ago3, Ago4 and Ago5 genes was downregulated from the zygotic cleavage stage,except for the increase of Ago1, Ago3 and Ago4 expression in the 2-cell embryo, and of Ago2 in 4- and 8-cell embryos			García-López J and del Mazo. J.Biochim Biophys Acta. 2012 Aug;1819(8):847-54.
22	bovine	cDNA library and Taqman real-time PCR				cumulus oophorus cells				1798 putative miRNA sequences; 64 miRNA clusters matched previously reported sequences in the miRBase database and 5 miRNA clusters had not been reported. The expression of let-7b and let-7i were not different between the cellular populations from various sized follicles; all the miRNA processing genes have greater expression in oocytes compared with COCs and granulosa cells. The expression of po…			Miles JR et al., Anim Reprod Sci. 2012 Jan;130(1-2):16-26.
23								sperm		6 miRNAs expressed in the sperm and the zygotes but not in the oocytes or preimplantation embryos were identified. Sperm contained both the precursor and the mature form of one of these miRNAs; sperm-borne miR-34c was shown to be important for the first cell division via modulation of Bcl-2 expression		absence of an increased level of miR-34c in zygotes derived from α-amanitin-treated oocytes and in parthenogenetic oocytes; injection of miR-34c inhibitor into zygotes inhibited DNA synthesis and significantly suppressed first cleavage division; 3' UTR luciferase assay and Western blotting demonstrated that miR-34c regulates Bcl-2 expression in the zygotes. Coinjection of anti-Bcl-2 antibody in z…	Liu WM et al., Proc Natl Acad Sci U S A. 2012 Jan 10;109(2):490-4.
24	mouse	real-time PCR					zygote			miR-135A regulates preimplantation embryo development through down-regulation of SIAH1A expression		microinjection of miR-135a inhibitor suppressed first cell cleavage in more than 30% of the zygotes. Co-injection of Siah1a-specific antibody with miR-135a inhibitor partially nullified the effect of miR-135a inhibition. Proteasome inhibition by MG-132 revealed that miR-135a regulated proteasomal degradation and potentially controlled the expression of chemokinesin DNA binding protein	Pang RT et al., PLoS One. 2011;6(11):e27878.
25	bovine	real time PCR			oocyte	cumulus cells				47 and 51 miRNAs were highly abundant in GV and MII oocytes vers. cumulus cells; 6 miRNAs enriched in oocyte miR-205, miR-150, miR-122, miR-96, miR-146a and miR-146b-5p showed a dramatic decrease in abundance from 0 h to 22 h of maturation. The expression of the same miRNAs in preimplantation stage embryos was found to be highly abundant in early stages of embryo development and decreased after t…			Abd El Naby WS et al., Zygote. 2013 Feb;21(1):31-51.
26	bovine				oocyte and early embryos					expression analysis of miR-196a in bovine oocytes and during early embryonic development indicated that it is expressed both in oocytes and embryos and tends to increase at the four-cell and eight-cell stages		ectopic expression of miR-196a mimic in bovine early embryos significantly reduced the NOBOX expression at the both mRNA and protein levels	Tripurani SK et al., BMC Dev Biol. 2011 May 6;11:25.
27	bovine				oocyte to blastocyst stage					NPM2 mRNA is abundant in GV and MII stage oocytes, decreases in early cleavage stage embryos, and barely detectable in morula and blastocyst stage embryos. Similarly, expression of NPM2 protein is high in oocytes and early embryos but extremely low in blastocysts		transfection experiments showed that bovine NPM2 protein expression is reduced in Hela cells expressing miR-181a compared to control cells without miR-181a, indicating that translation of NPM2 is repressed by miR-181a	Lingenfelter BM et al., Reprod Biol Endocrinol. 2011 Mar 29;9:40.
28													Cui XS et al., Biochem Biophys Res Commun. 2007 Jan 5;352(1):231-6.
29	mouse	quantitative PCR						sperm		miRNAs are present in mouse sperm structures that enter the oocyte at fertilization; sperm contain a broad profile of miRNAs and a subset of potential mRNA targets, which were expressed in fertilizable metaphase II (MII) oocytes;data suggest that sperm-borne prototypical miRNAs play a limited role, if any, in mammalian fertilization or early preimplantation development		levels of sperm-borne miRNA are low relative to those of unfertilized MII oocytes, and fertilization does not alter the mII oocyte miRNA repertoire that included the most abundant sperm-borne miRNAs; coinjection of MII oocytes with sperm heads plus anti-miRNAs to suppress miRNA function did not perturb pronuclear activation or preimplantation development; in contrast, nuclear transfer by microinj…	Amanai M et al., Biol Reprod. 2006 Dec;75(6):877-84.
30	mouse	microarray assay and real-time PCR								a total of 97 (43 "new" and 54 known) including mouse, human, and predicted miRNAs have been discovered in the preimplantation mouse embryos and analysed with TargetsScan system and PANTHER classification system; a dynamic synthesis and degradation of miRNAs coexists in the preimplantation development of mouse embryos was observed; overall quantity of miRNAs and percentage of the stage-dependent …			Yang Y et al., Dev Dyn. 2008 Sep;237(9):2315-27.
31	mouse	conditional knock-out model: adult female Dicer1fl/fl;Amhr2Cre/+ mice								Dicer1 is essential for female fertility and normal development of the female reproductive system			Hong X et al., Endocrinology. 2008 Dec;149(12):6207-12.
32	mouse	conditional knock-out model: adult female Dicer1fl/fl;Amhr2Cre/+ mice								Dicer1 plays important roles in follicular cell development through the differential regulation of gene expression			Lei et al., Mol Cell Endocrinol. 2010 Feb 5;315(1-2):63-73.
33	mouse	high-throughput pyrosequencing			MII oocytes, 8-16-cell stage embryos, blastocysts and the pluripotent inner cell mass (ICM)					small RNA class transition from siRNA/piRNA to miRNA during pre-implantation mouse development			Ohnishi Y et al., Nucleic Acids Res. 2010 Aug;38(15):5141-51.
34
35
36
37
38
39
40
41
42
